# Supplementary material for: Cigarette Smoking and Human Gut Microbiota in Healthy Adults: A Systematic Review
Source: MDPI journal article supplement (doi:10.3390/biomedicines10020510), 2022-02-21
Supplement: s1 [file s1]

| Studies    |              |             |            |           |               |             |             |               |        |          |           | Items                                                                      |
|------------|--------------|-------------|------------|-----------|---------------|-------------|-------------|---------------|--------|----------|-----------|----------------------------------------------------------------------------|
| Chen, 2016 | Curtis, 2018 | Ishaq, 2017 | Kato, 2010 | Lee, 2018 | Stewart, 2018 | Zhang, 2019 | Shima, 2019 | Prakash, 2021 | Nolan- | Harakeh, | Lin, 2020 |                                                                            |
| 😊          | 😞            | 😊           | 😊          | 😊         | 😊             | 😊           | 😊           | 😊             | 😊      | 😊        | 😊         | 1.Were the criteria for inclusion in the sample clearly defined?           |
| 😊          |              | 😊           |            |           |               |             | 😊           | 😊             |        | 😊        | 😊         | 2.Were the study subjects and the setting described in detail?             |
| 😊          |              | 😞           |            |           |               |             |             |               | 😊      | 😊        | 😊         | 3.Was the exposure measured in a valid and reliable way?                   |
| 😊          | 😊            | 😊           |            |           |               |             | 😊           | 😊             | 😊      | 😊        | 😊         | 4.Were objective, standard criteria used for measurement of the condition? |
| 😊          | 😊            | 😊           |            |           |               |             | 😊           | 😊             | 😊      | 😊        | 😊         | 5.Were confounding factors identified?                                     |
| 😞          | 😞            | 😞           |            | 😞         | 😞             |             | 😊           | 😊             | 😊      |          |           | 6.Were strategies to deal with confounding factors stated?                 |
| 😊          | 😊            | 😊           |            | 😊         | 😊             |             | 😊           | 😊             | 😊      | 😊        | 😊         | 7.Were the outcomes measured in a valid and reliable way?                  |
| 😊          | 😊            | 😊           |            | 😊         | 😊             |             | 😊           | 😊             | 😊      | 😊        | 😊         | 8.Was appropriate statistical analysis used?                               |

**Supplementary Table S1.** Quality assessment of cross-sectional studies according to JBI tools.
