# Supplementary figures and images for: Cigarette Smoking and Human Gut Microbiota in Healthy Adults: A Systematic Review
Source: MDPI journal article supplement (doi:10.3390/biomedicines10020510), 2022-02-21

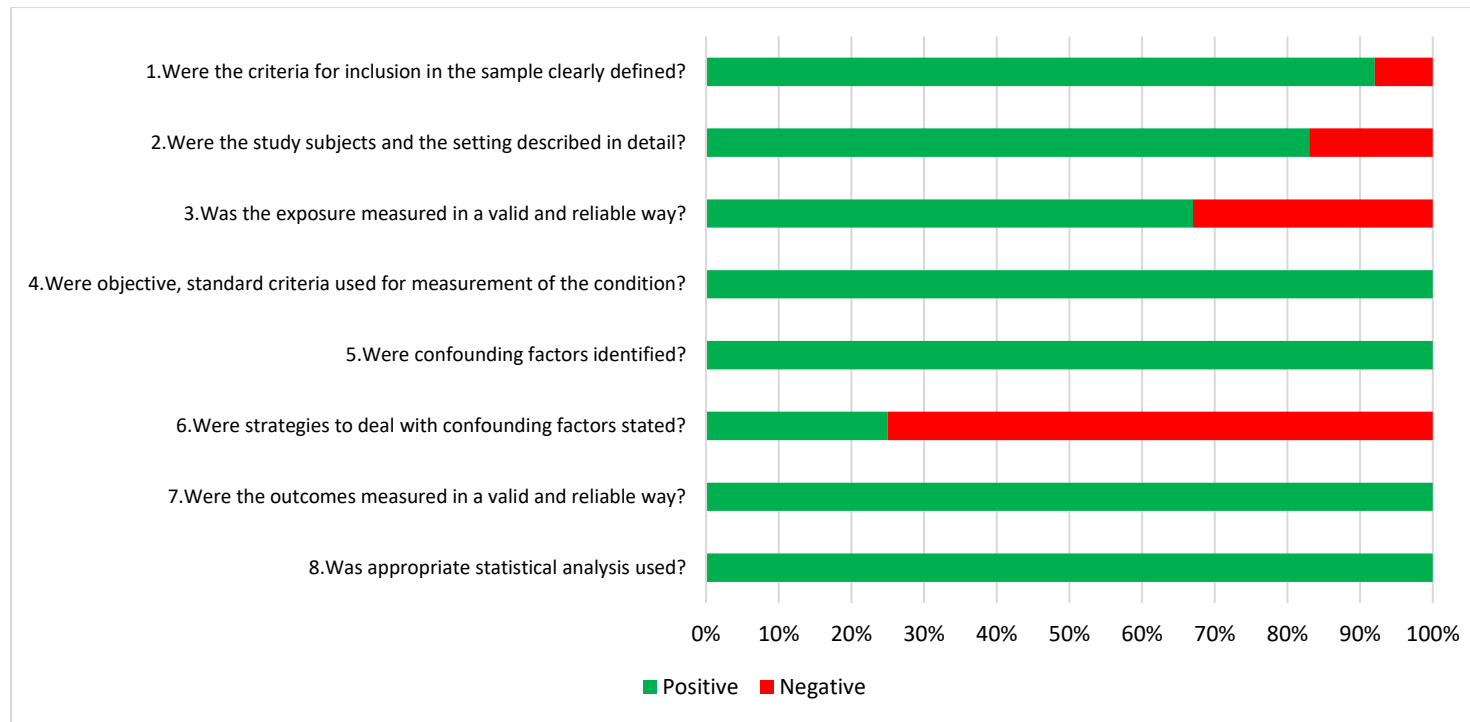

**Supplementary Figure S1.** Quality assessment of cross-sectional studies.

Supplement: s1 [file s1]
